# Supplementary material
Source: MDPI journal article supplement (https://www.mdpi.com/2072-4292/15/1/226)
Supplement: s1 [file s1]

## Supplementary Materials

The algorithm proposed in Pinton et al. (2020b), is based on the following steps (adapted from Pinton et al. (2020b)).

**STEP 1:** a regular grid that covers the study domain is used to split the point cloud into subsets, defined as  $PC_{n,e}$ . These subsets are constituted of the points contained in the grid cells  $(n,e)$ , which dimension is 30 cm  $\times$  30 cm, in this study.

**STEP 2:** For each point cloud subset  $PC_{n,e}$ , the elevation of the lowest point is calculated as follows:

$$z_{PC_{n,e}}^{min} = \min_{p \in PC_{n,e}} [z_p], \quad (A1)$$

where  $z_p$  is the elevation of the generic point  $p$  in  $PC_{n,e}$ .

**STEP 3:** a least-squares regression surface  $F(x, y)$  is defined by using the coordinates of the lowest points of the nine cells constituting  $ST_{n,e}$  (i.e., the group of nine cells, centered in the considered cell  $(n,e)$ ). The surface is defined as:

$$F(x, y) = \beta_{0,n,e} + \beta_{1,n,e} x + \beta_{2,n,e} y + \beta_{3,n,e} x^2 + \beta_{4,n,e} y^2 + \beta_{5,n,e} xy, \quad (A2)$$

where  $\beta_{0,n,e}$  is the intercept of the plane with a vertical axis passing for the midpoint of  $ST_{n,e}$ , and  $\beta_{1...5,n,e}$  are the partial regression coefficients of the regression surface.  $\beta_{0,n,e}$  is

also the origin of the horizontal coordinates of the surface. The regression plane instead, reads:

$$F(x, y) = \beta_{0,n,e} + \beta_{x,n,e} x + \beta_{y,n,e} y, \quad (\text{A3})$$

where  $\beta_{x,n,e}$  and  $\beta_{y,n,e}$  are the eastward and northward slopes of the regression plane, respectively.

**STEP 4:** the vertical distance between the regression plane and the points of the point cloud contained in  $ST_{n,e}$  is calculated as:

$$\Delta z_s^{surface} = [z_s - F(x_s, y_s)]_{s \in ST_{n,e}}, \quad (\text{A4})$$

where  $x_s, y_s$ , and  $z_s$  are the coordinates of the  $s^{th}$  point of the point cloud. The origin of the coordinates  $x_s$  and  $y_s$  is the midpoint of  $ST_{n,e}$ .

**STEP 5:** for each  $ST_{n,e}$ , the transformed point cloud is obtained by summing the vertical distances  $\Delta z_s^{surface}$ , calculated for each point at STEP 4, to  $\beta_{0,n,e}$ . Thus, the elevation of the  $s^{th}$  point ( $z_s^{trans}$ ) is calculated as:

$$z_s^{trans} = \beta_{0,n,e} + \Delta z_s^{surface}. \quad (\text{A5})$$

**STEP 6:** the elevation of the lowest point of the transformed point cloud ( $z_{ST_{n,e}}^{min}$ ) in  $ST_{n,e}$  is calculated as:

$$z_{ST_{n,e}}^{min} = \min_{s \in ST_{n,e}} [z_s^{trans}]. \quad (\text{A6})$$

To conclude, the elevation ( $z_s^{rel}$ ) of the  $s^{th}$  point of the transformed point cloud, relative to the lowest point in  $ST_{n,e}$  ( $z_{ST_{n,e}}^{min}$ ), is calculated as follows:

$$z_s^{rel} = z_s^{trans} - z_{ST_{n,e}}^{min}. \quad (A7)$$

## References

1. Pinton, D.; Canestrelli, A.; Wilkinson, B.; Ifju, P.; Ortega, A. A new algorithm for estimating ground elevation and vegetation characteristics in coastal salt marshes from high-resolution UAV-based LiDAR point clouds. *Earth Surf. Process. Landforms* **2020**, *45*, 3687–3701, doi:10.1002/esp.4992.
